# Supplementary material for: Bridging Mo2C–C and highly dispersed copper by incorporating N-functional groups to greatly enhance the catalytic activity and durability for carbon dioxide hydrogenation
Source: Royal Society of Chemistry journal article supplement (doi:10.1039/c8ta04096f), 2018-01-01
Supplement: c8ta04096f1.pdf [file c8ta04096f1.pdf]

## Electronic Supplementary Information

### Experimental section

#### Catalyst preparation

**Preparation of Mo<sub>2</sub>C-C:** 2.0 g of sodium alginate (Adamas) and 2.0 g of Na<sub>2</sub>MoO<sub>4</sub>·2H<sub>2</sub>O (Adamas) were dissolved into 180 mL of H<sub>2</sub>O under continuous stirring 2 h. After the aqueous solution turned into transparent, it was freeze-dried and lyophilized to remove H<sub>2</sub>O and form a 3D molybdate-organic precursor structure. The sample was heated to 900 °C at 5 °C min<sup>-1</sup> and held at this temperature for 3 h in Ar. Afterwards, the obtained black solid was ground into powder and washed with distilled water for several times to remove Na<sup>+</sup> and residue of reactants, and finally dried in vacuum at 80 °C.

**N-functional Mo<sub>2</sub>C-C:** 1 g of Mo<sub>2</sub>C-C and urea (Adamas) with different weight ratio (Mo<sub>2</sub>C/C:urea=1, 1.5, 2, and 3, respectively) were physically grinded, followed by adding a little ethanol as the wetting agent. The mixture was collected in a ceramic crucible and heated at 350 °C for 2 h under air atmosphere. The obtained product was washed with distilled water for removing unreacted urea. The as-synthesized N-functional Mo<sub>2</sub>C-C catalysts, denoted as Mo<sub>2</sub>C-N-C-1, Mo<sub>2</sub>C-N-C-1.5, Mo<sub>2</sub>C-N-C-2, and Mo<sub>2</sub>C-N-C-3, were then collected and dried at 60 °C.

**Preparation of Cu-Mo<sub>2</sub>C-N-C-x:** The Mo<sub>2</sub>C-N-C-x with highly dispersed Cu were prepared by the solid grinding method using Mo<sub>2</sub>C-N-C-x and Cu(NO<sub>3</sub>)<sub>2</sub>·3H<sub>2</sub>O (Adamas) to obtain 5 wt% of Cu loading. The mixture was reduced at 400 °C for 2 h under 5% H<sub>2</sub>/Ar atmosphere to obtain Cu-Mo<sub>2</sub>C-N-C-1, Cu-Mo<sub>2</sub>C-N-C-1.5, Cu-Mo<sub>2</sub>C-N-C-2, and Cu-Mo<sub>2</sub>C-N-C-3. The corresponding N content is 3.51, 4.27, 5.05, and 6.98 wt %, respectively. For comparison, 5 wt% Cu is also supported on pure C, N-functional C (N-C), and Mo<sub>2</sub>C-C with the same procedure, respectively.

### **Catalyst characterization**

The morphology and the microstructure of the catalysts were analyzed by field-emission scanning electron microscope (FE-SEM, JSM-7800, Japan), transmission electron microscope (TEM, Hitachi, Tokyo, Japan), X-ray diffraction (XRD-6000, Shimadzu), and X-ray photoelectron spectroscopy (XPS, PHI 550 ESCA/SAM), respectively. The Raman spectra were recorded on the Raman Scattering Spectroscopy (Renishaw 2000 system) with excitation by diode laser (514 nm, laser power of 25 mW) in backscattering geometry. The surface area of catalysts is measured from N<sub>2</sub> adsorption isotherms using Brunauer-Emmett-Teller (BET, Shimadzu, Micromeritics ASAP 2010 Instrument). Hydrogen temperature-programmed reduction (H<sub>2</sub>-TPR) of the catalysts was carried out using a conventional apparatus equipped with a thermal conductivity detector.

### **Catalytic performance evaluation**

The CO<sub>2</sub> hydrogenation reaction was carried out in a fixed-bed reactor at atmospheric pressure and the temperature range of 240 ~ 400 °C to investigate the catalytic performance of the catalysts. The reactor is a 6 mm i.d. quartz U-tube. Typically, 50 mg catalyst was pre-reduced at 400 °C for only 0.5 h at H<sub>2</sub> flow because these catalysts were reduced at 400 °C for 2 h under 5% H<sub>2</sub>/Ar atmosphere during the preparation. When the catalyst cooled down to 200 °C under the H<sub>2</sub> flow, the feed gas (10 vol.% CO<sub>2</sub>, 40 vol.% H<sub>2</sub> and 50 vol.% Ar) was introduced into the tube with the weight hourly space velocity (WHSV) of 60,000 mL<sup>-1</sup> g<sup>-1</sup> h<sup>-1</sup>. The compositions of the feed gas and products were analyzed using a packed TDX-01 column with an on-line gas chromatograph (SC 200G) equipped with a thermal conductivity detector.

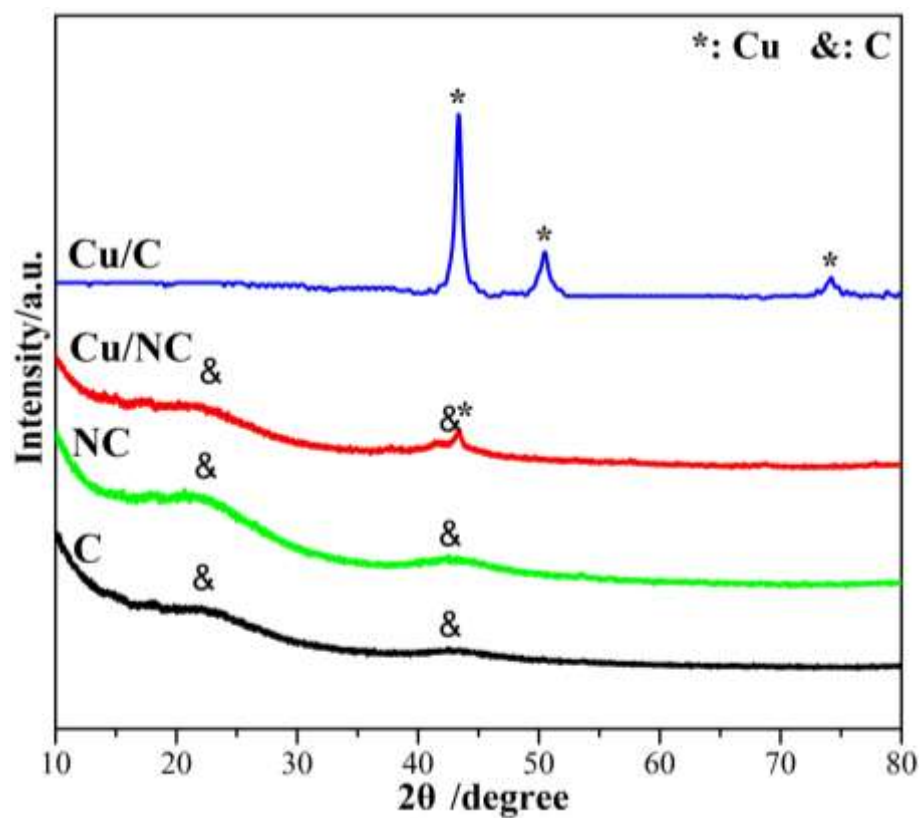

**Fig. S1** XRD patterns of (a) C, (b) N-C, (c) Cu-N-C, and (d) Cu-C catalysts.

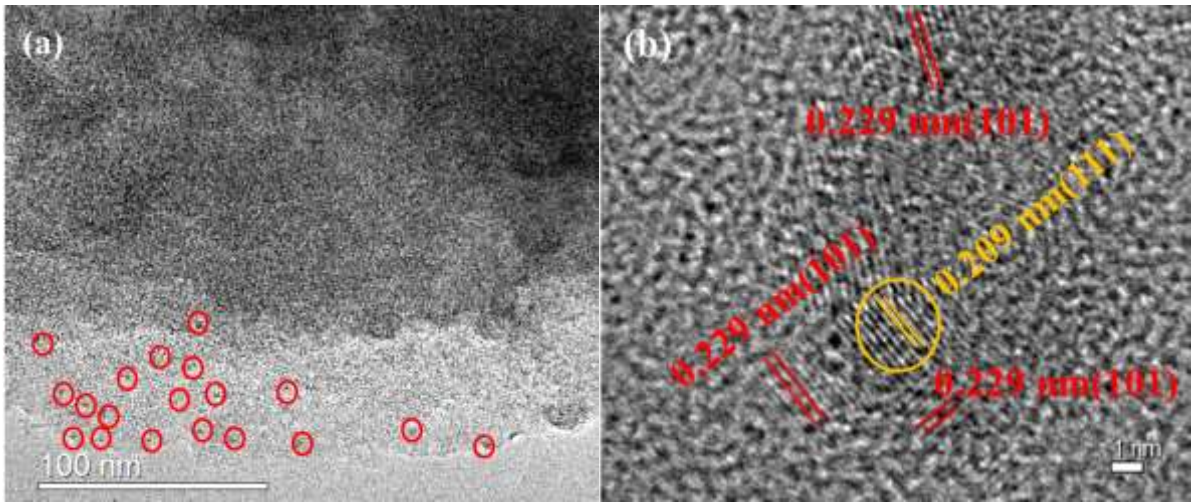

**Fig. S2** TEM and HRTEM images of Cu-Mo<sub>2</sub>C-N-C.

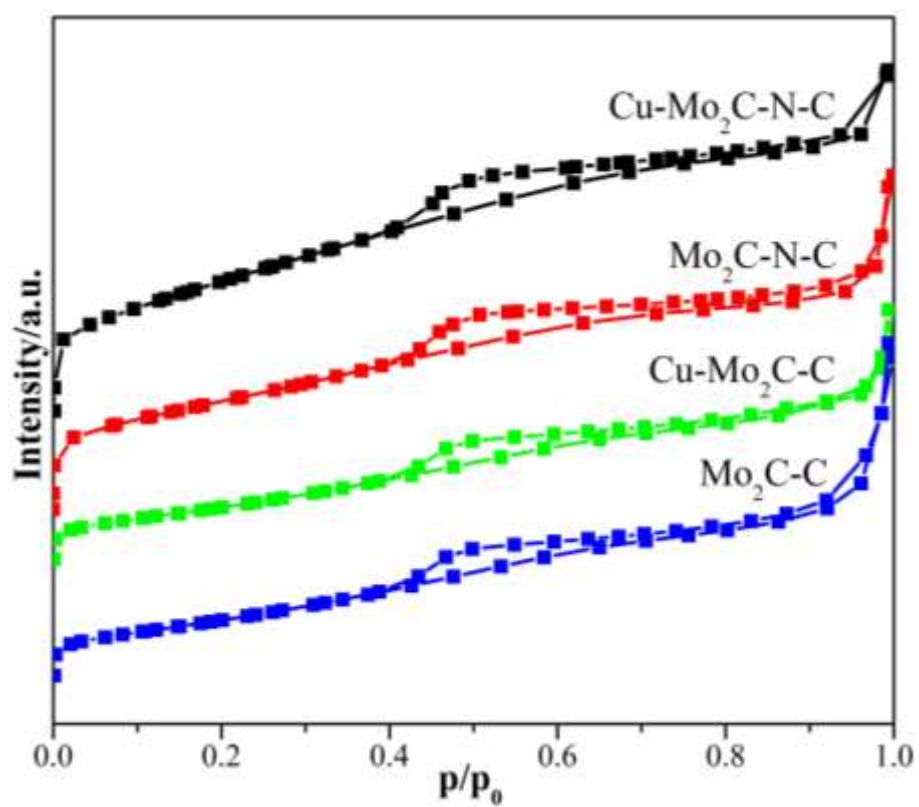

**Fig. S3** N<sub>2</sub> adsorption-desorption isotherms of the catalysts.

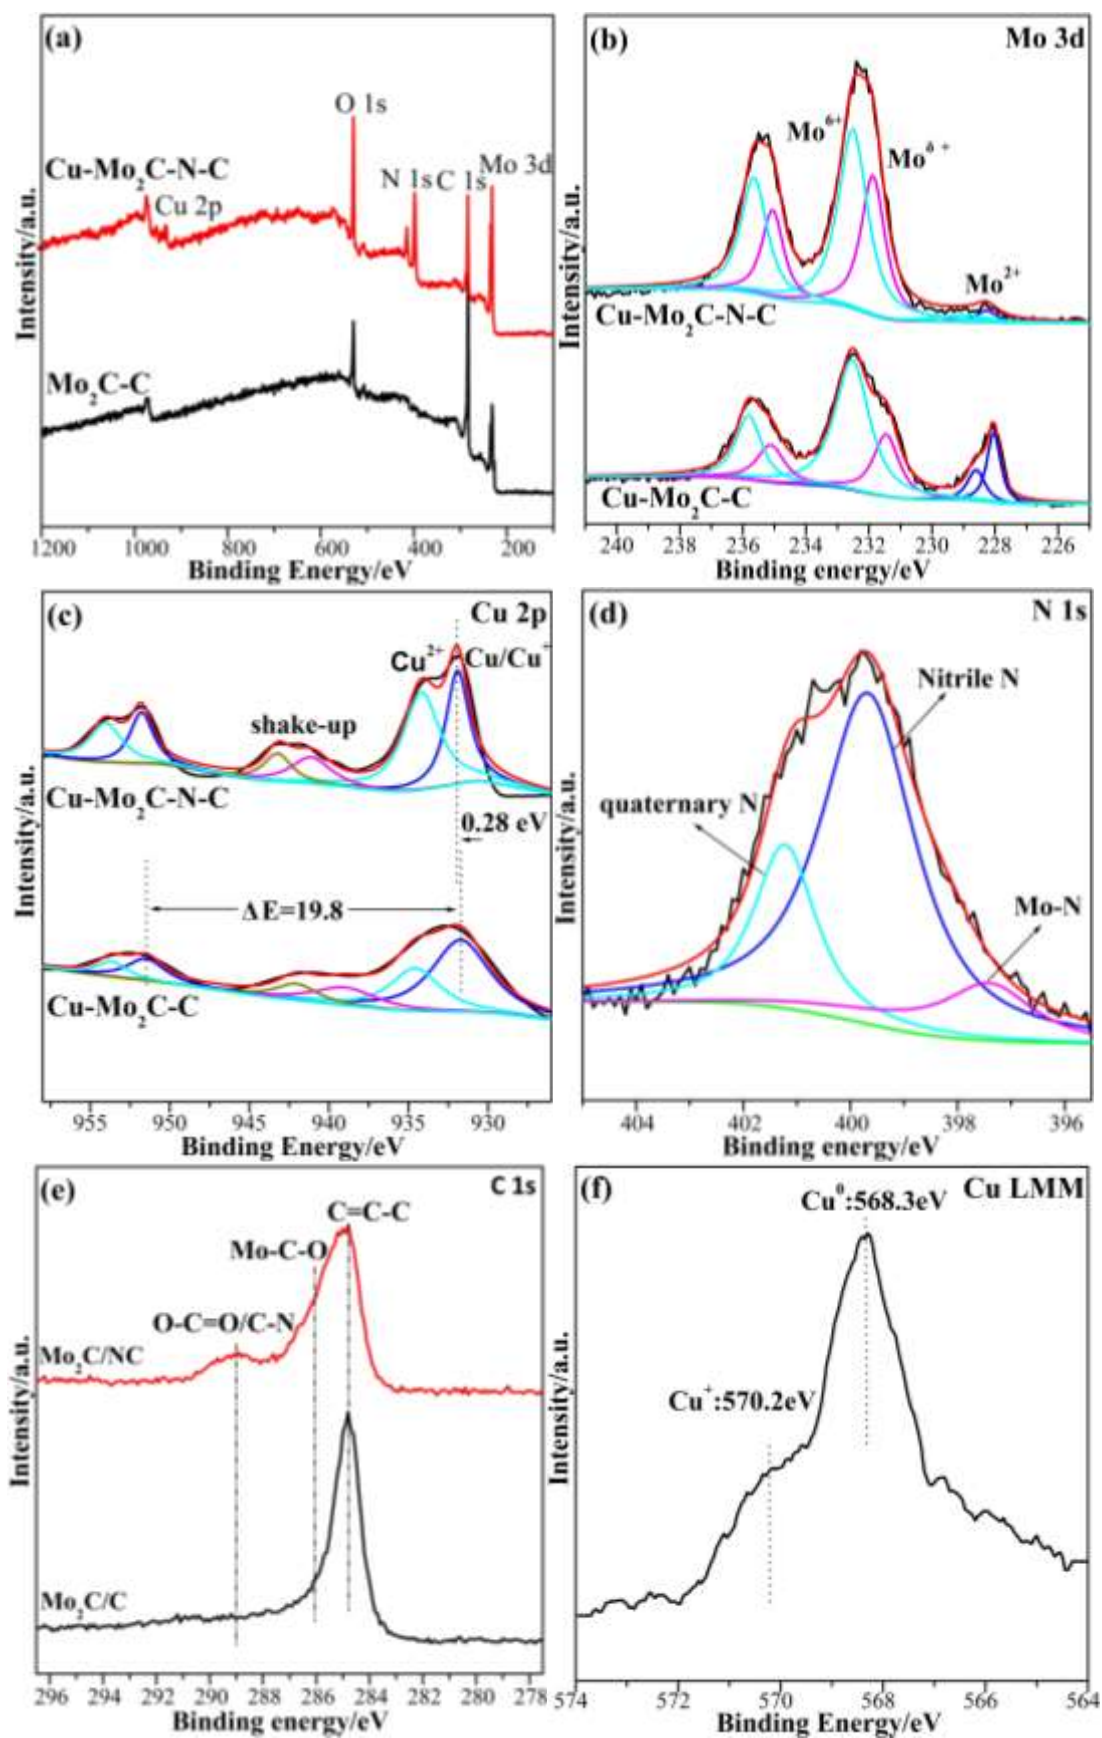

Fig. S4 XPS spectra of (a) survey, (b) Mo 3d, (c) Cu 2p; (d) N 1s; (e) C 1s and (f) Cu LMM

AES spectra.

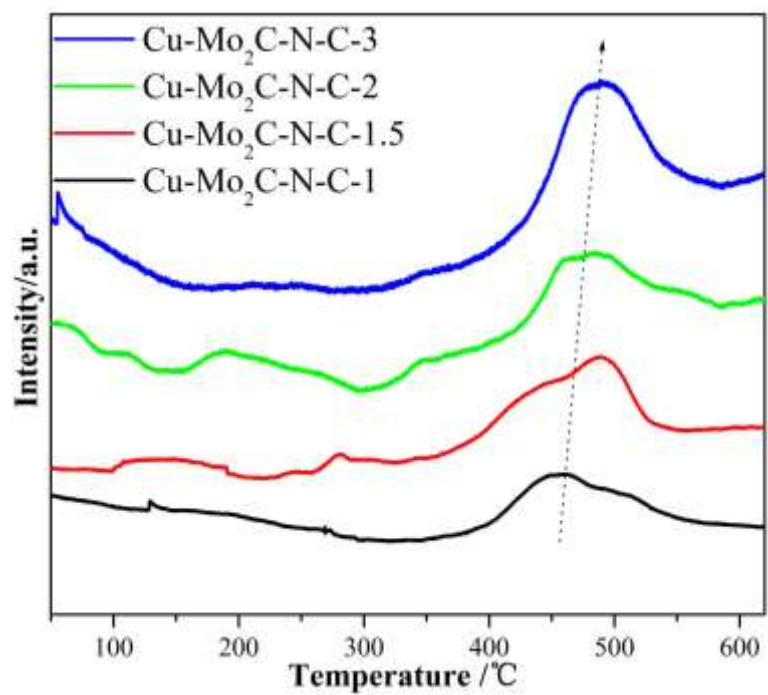

**Fig. S5** CO<sub>2</sub>-TPD profiles of the Cu-Mo<sub>2</sub>C-N-C catalysts with different N content.

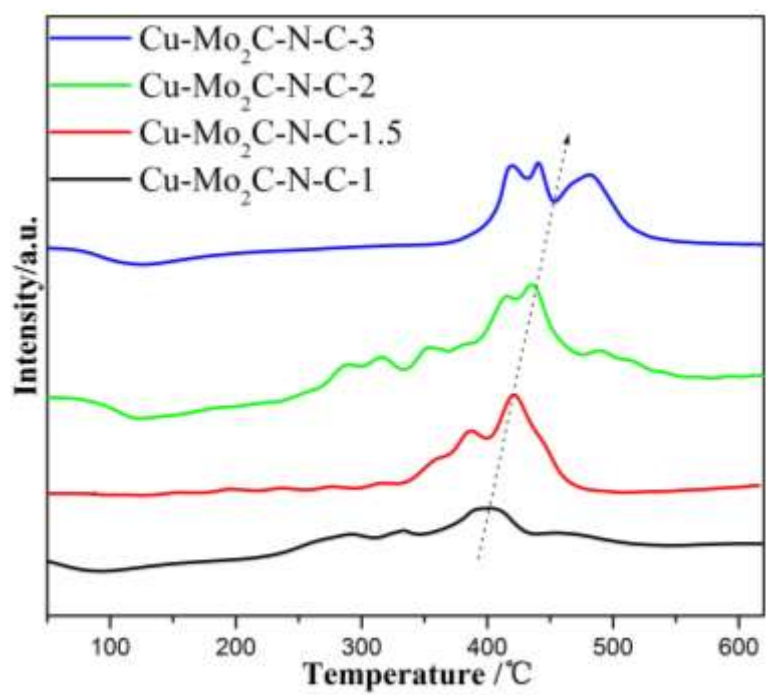

**Fig. S6** H<sub>2</sub>-TPR profiles of the Cu-Mo<sub>2</sub>C-N-C catalysts with different N content.



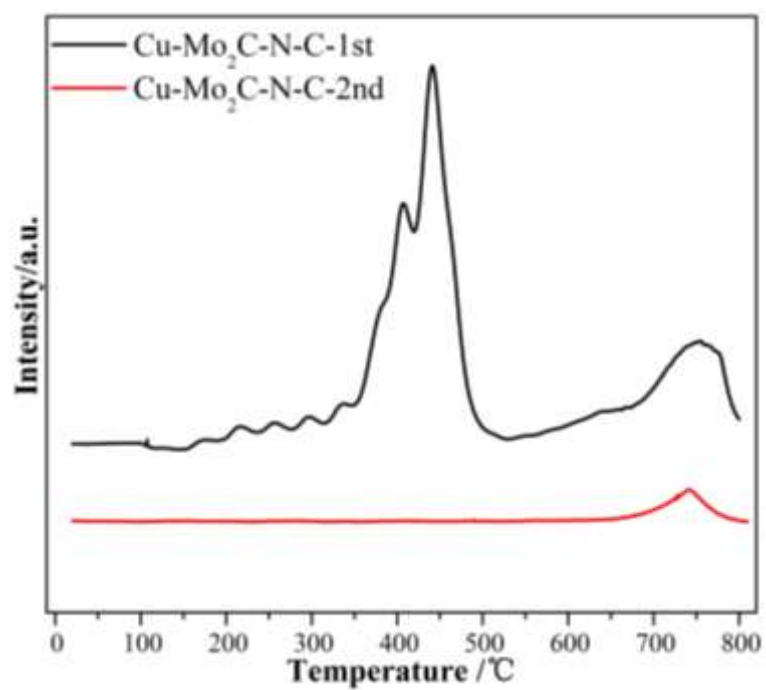

**Fig. S7** H<sub>2</sub>-TPR profiles of the representative Cu-Mo<sub>2</sub>C-N-C-1.5 catalyst for continuously testing 2 times H<sub>2</sub>-TPR experiment.

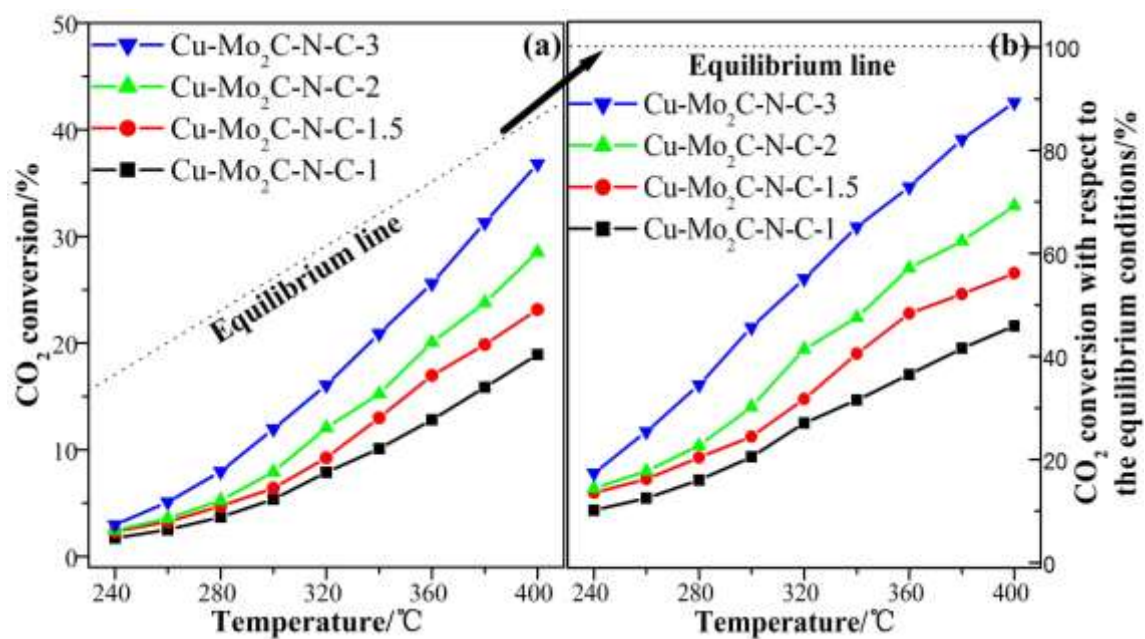

**Fig. S8** (a) CO<sub>2</sub> conversion as a function of reaction temperature and (b) the corresponding CO<sub>2</sub> conversion with respect to the equilibrium conditions over the Cu-Mo<sub>2</sub>C-N-C catalysts with different N content.

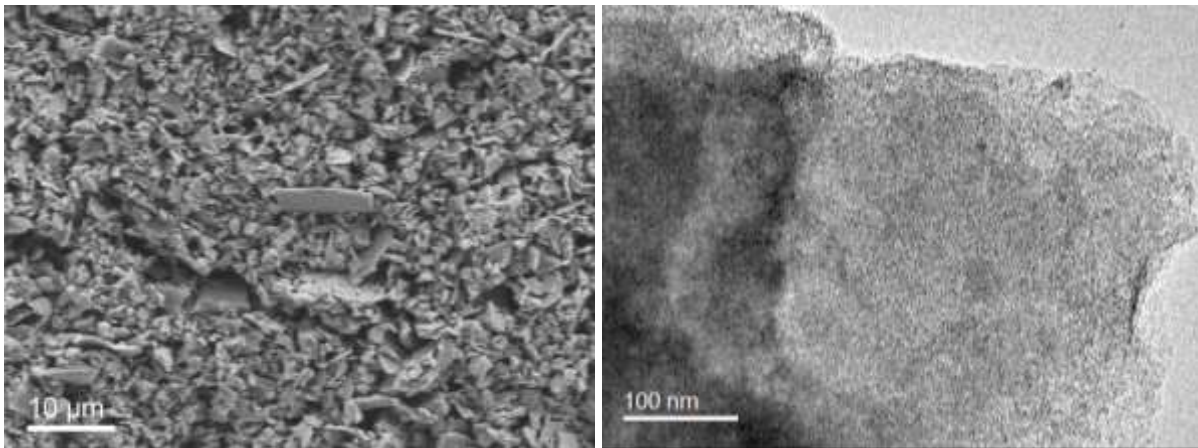

**Fig. S9** FESEM and TEM images of used Cu-Mo<sub>2</sub>C-N-C.

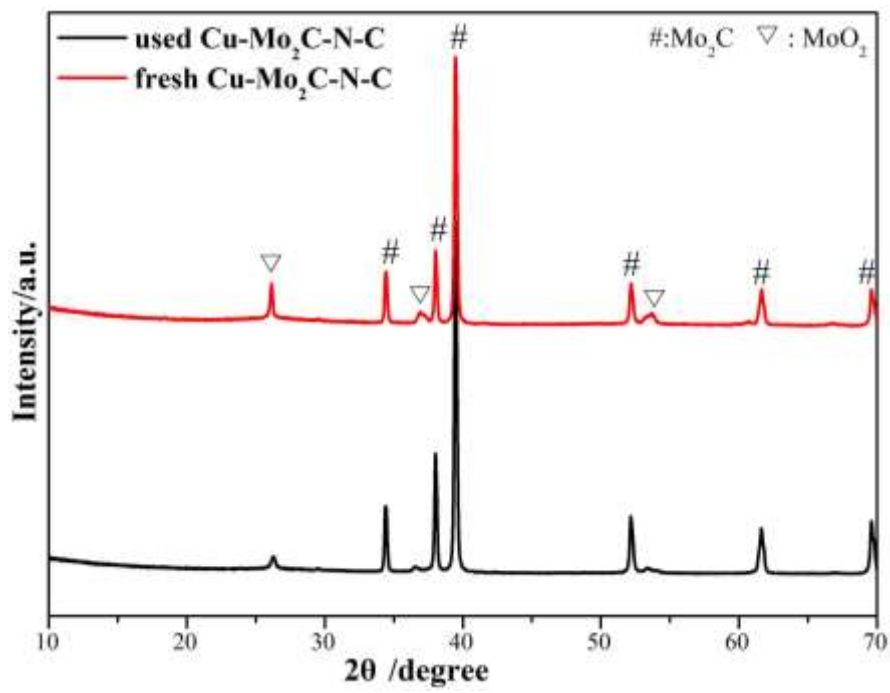

**Fig. S10** XRD patterns of fresh and used Cu-Mo<sub>2</sub>C-N-C catalyst.

**Table S1.** The surface area and porous characteristics of the catalysts.

| Catalysts                    | Surface area<br>( $\text{m}^2 \text{g}^{-1}$ ) | Pore diameter<br>(nm) | Total pore volume<br>( $\text{cm}^3 \text{g}^{-1}$ ) |
|------------------------------|------------------------------------------------|-----------------------|------------------------------------------------------|
| Mo <sub>2</sub> C-C          | 95.7                                           | 4.0                   | 0.212                                                |
| Cu-Mo <sub>2</sub> C-C       | 78.9                                           | 4.0                   | 0.155                                                |
| Mo <sub>2</sub> C-N-C        | 186.3                                          | 5.1                   | 0.289                                                |
| Cu-Mo <sub>2</sub> C-N-C-1   | 180.6                                          | 5.1                   | 0.263                                                |
| Cu-Mo <sub>2</sub> C-N-C-1.5 | 175.8                                          | 5.1                   | 0.257                                                |
| Cu-Mo <sub>2</sub> C-N-C-2   | 183.4                                          | 5.1                   | 0.274                                                |
| Cu-Mo <sub>2</sub> C-N-C-3   | 179.1                                          | 5.1                   | 0.259                                                |

**Table S2.** Comparison of catalytic performance of Cu-Mo<sub>2</sub>C-N-C-x from current work with similar catalysts from literature studies.

| Catalysts                                            | T<br>(°C) | P<br>(MPa) | CO <sub>2</sub> :H <sub>2</sub><br>ratio | WHSV<br>(mL <sup>-1</sup> g <sup>-1</sup> h <sup>-1</sup> ) | Conversion<br>(%) | CO sel.<br>(%) | Ref.                                                             |
|------------------------------------------------------|-----------|------------|------------------------------------------|-------------------------------------------------------------|-------------------|----------------|------------------------------------------------------------------|
| Cu-Mo <sub>2</sub> C-N-C-1                           |           |            |                                          |                                                             | 18.92             | 100            |                                                                  |
| Cu-Mo <sub>2</sub> C-N-C-1.5                         | 400       | 0.1        | 1:4                                      | 60,000                                                      | 23.15             | 100            | This work                                                        |
| Cu-Mo <sub>2</sub> C-N-C-2                           |           |            |                                          |                                                             | 27.53             | 95.6           |                                                                  |
| Cu-Mo <sub>2</sub> C-N-C-3                           |           |            |                                          |                                                             | 37.41             | 89.3           |                                                                  |
| Mo <sub>2</sub> C/γ-Al <sub>2</sub> O <sub>3</sub>   | 300       | 2.1        | 1:3                                      | 3,024                                                       | 19.9              | 73.5           | <i>ChemSusChem</i><br><b>2017</b> , 10, 2408                     |
| K-Mo <sub>2</sub> C/γ-Al <sub>2</sub> O <sub>3</sub> |           |            |                                          |                                                             | 18.1              | 95.9           |                                                                  |
| β-Mo <sub>2</sub> C                                  | 400       | 0.1        | 1:2                                      | 300,000                                                     | ~2                | 100            | <i>ACS Catal.</i> <b>2017</b> ,<br>7, 912                        |
| Cu/β-Mo <sub>2</sub> C                               |           |            |                                          |                                                             | ~16               | 97.6           |                                                                  |
| α-MoC <sub>1-x</sub><br>nanowires                    | 400       | 0.1        | 1:4                                      | 36,000                                                      | ~20               | >99            | <i>Catal. Commun.</i><br><b>2016</b> , 84, 147                   |
| β-Mo <sub>2</sub> C nanowires                        |           |            |                                          |                                                             | ~30               | >98            |                                                                  |
| Polycrystalline<br>α-Mo <sub>2</sub> C               | 400       | 0.1        | 1:1                                      | 3000                                                        | 16                | >99            | <i>ACS Catal.</i> <b>2017</b> ,<br>7, 4323                       |
| Cu-Mo <sub>2</sub> C                                 |           |            |                                          |                                                             | 19                | 38             |                                                                  |
| Ni-Mo <sub>2</sub> C                                 | 300       | 2          | 1:5                                      | 9,000                                                       | 29                | 22             | <i>Catal. Lett.</i> <b>2015</b> ,<br>145, 1365                   |
| Co-Mo <sub>2</sub> C                                 |           |            |                                          |                                                             | 31                | 19             |                                                                  |
| Mo <sub>2</sub> C                                    |           |            |                                          |                                                             | 8.7               | 93.5           | <i>Angew. Chem. Int.</i><br><i>Ed.</i> <b>2014</b> , 53,<br>6705 |
| Co-Mo <sub>2</sub> C                                 | 300       | 0.1        | 1:2                                      | 36,000                                                      | 9.5               | 98.1           |                                                                  |
| PtCo/TiO <sub>2</sub>                                |           |            |                                          |                                                             | 8.2               | 98.8           | <i>Angew. Chem. Int.</i><br><i>Ed.</i> <b>2016</b> , 55,<br>7968 |
| PtCo/CeO <sub>2</sub>                                | 300       | 0.1        | 1:2                                      | 36,000                                                      | 9.1               | 92.3           |                                                                  |
| PtCo/ZrO <sub>2</sub>                                |           |            |                                          |                                                             | 7.8               | 89.5           |                                                                  |
